# Supplementary material for: Dissecting the genetic basis of focal cortical dysplasia: a large cohort study
Source: PubMed Central journal article supplement (PMC6851393; doi:10.1007/s00401-019-02061-5), 2019-08-23
Supplement: 401_2019_2061_MOESM1_ESM.pdf [file 401_2019_2061_MOESM1_ESM.pdf]

# **DISSECTING THE GENETIC BASIS OF FOCAL CORTICAL DYSPLASIA: A LARGE COHORT STUDY**

Sara Baldassari PhD<sup>1</sup>, Théo Ribierre MSc<sup>1</sup>, Elise Marsan PhD<sup>1</sup>, Homa Adle-Biassette MD<sup>2,3</sup>, Sarah Ferrand-Sorbets MD<sup>4</sup>, Christine Bulteau MD PhD<sup>4</sup>, Nathalie Dorison MD<sup>4</sup>, Martine Fohlen MD<sup>4</sup>, Marc Polivka MD<sup>3</sup>, Sarah Weckhuysen MD PhD<sup>1,5</sup>, Georg Dorfmueller MD<sup>4</sup>, Mathilde Chipaux MD PhD<sup>4</sup> and Stéphanie Baulac PhD<sup>1</sup>

**1** Sorbonne Université, UPMC Univ Paris 06, UMR S 1127; INSERM, U1127; CNRS, UMR 7225; Institut du Cerveau et de la Moelle épinière (ICM), Hôpital Pitié-Salpêtrière, F-75013, Paris, France.

**2** INSERM UMR 1141, Hôpital Robert-Debré, F-75019, Paris, France; Faculté de Médecine Denis Diderot, Université Paris 7, Paris, France.

**3** Service d'Anatomie et de Cytologie Pathologiques, Hôpital Lariboisière, APHP, F-75010, Paris, France

**4** Department of Pediatric Neurosurgery, Rothschild Foundation Hospital, F-75019, Paris, France.

**5** Department of Neurology, University Hospital Antwerp, Belgium.

## **Corresponding author:**

Stéphanie Baulac, PhD

Institut du Cerveau et de la Moelle épinière - ICM

Hôpital Pitié-Salpêtrière - 47, bd de l'hôpital - 75013 Paris

Phone : +33 (0)1 57 27 43 39 / E-mail: stephanie.baulac@upmc.fr

## Supplemental Data

### Complete list of the genes included in the three versions of the custom panel

Genes reported in blue are common to all versions

**Panel version 1 (25 genes):** *AKT1* (NM\_005163), *AKT2* (NM\_001626), *AKT3* (NM\_005465), *CNTNAP2* (NM\_014141), *DEPDC5* (NM\_001242896), *MIOS* (NM\_019005), *MTOR* (NM\_004958), *NPRL2* (NM\_006545), *NPRL3* (NM\_001077350), *PIK3CA* (NM\_006218), *PIK3CB* (NM\_006219), *PIK3CD* (NM\_005026), *PIK3R1* (NM\_181523), *PIK3R2* (NM\_005027), *PIK3R3* (NM\_003629), *PTEN* (NM\_000314), *RAB3GAP1* (NM\_001172435), *SEC13* (NM\_183352), *SEH1L* (NM\_001013437), *STRADA* (NM\_001003787), *TBC1D7* (NM\_016495), *TSC1* (NM\_000368), *TSC2* (NM\_000548), *WDR24* (NM\_032259), *WDR59* (NM\_030581)

**Panel version 2 (30 genes):** *AKT3*, *BRAF* (NM\_004333.4), *DEPDC5*, *DEPTOR* (NM\_022783.3), *FLCN* (NM\_144997), *LAMTOR4* (NM\_001008395.3), *LARS* (NM\_020117.10), *MIOS*, *MLST8* (NM\_001199173.1), *MTOR*, *NPRL2*, *NPRL3*, *PIK3CA*, *PIK3R2*, *PTEN*, *RABGAP1L* (NM\_014857.4), *RHEB* (NM\_005614.3), *RPS6* (NM\_001010.2), *RPS6KB1* (NM\_003161.3), *RPTOR* (NM\_020761.2), *RRAGA* (NM\_006570.4), *RRAGAB* (NM\_016656.3), *SEC13*, *SEH1L*, *SESN3* (NM\_144665.3), *SLC13A5* (NM\_177550.3), *TSC1*, *TSC2*, *WDR24*, *WDR59*

**Panel version 3 (26 genes):** *AKT3*, *BRAF*, *DEPDC5*, *DEPTOR*, *LAMTOR4*, *MIOS*, *MLST8*, *MTOR*, *NPRL2*, *NPRL3*, *PIK3CA*, *PTEN*, *RABGAP1L*, *RHEB*, *RICTOR* (NM\_001285439.1), *RPS6*, *RPTOR*, *SEC13*, *SEH1L*, *SLC35A2* (NM\_005660.2), *SZT2* (NM\_015284.3), *TBC1D7*, *TSC1*, *TSC2*, *WDR24*, *WDR59*

## Supplementary Table 2

### Droplet digital PCR for detection of VAFs enrichment in DNs and BCs

|            |                    | MTOR<br>p.Ser2215Phe       |                          |                              | MTOR<br>p.Thr1977Lys  | PIK3CA<br>p.His1047Arg     |
|------------|--------------------|----------------------------|--------------------------|------------------------------|-----------------------|----------------------------|
|            | <i>Patient</i>     | FCD-23                     | FCD-24                   | FCD-25                       | FCD-56                | HME-77                     |
| VAF<br>(%) | <i>Bulk tissue</i> | 4.86<br>(4.49-5.23)        | 2.32<br>(2.03-2.6)       | 8.73<br>(8.05-9.41)          | 3.67<br>(3.26-4.08)   | 21.66<br>(20.92-22.40)     |
|            | <i>BCs</i>         | N/A                        | N/A                      | N/A                          | 45.2 ± 6.7<br>[15+22] | N/A                        |
|            | <i>DNs</i>         | 38.4 ± 2.0<br>[100+100]    | 18.6 ± 1.1<br>[20+20]    | 37.2 ± 1.1<br>[80+100]       | 41.4 ± 20<br>[25+25]  | 34.7 ± 6.1<br>[20+50]      |
|            | <i>NNs</i>         | 7.56 (0.95-14.16)<br>[100] | 4.49 (1.15-7.84)<br>[55] | 17.98 (10.77-25.19)<br>[100] | 1.4 ± 1.9<br>[50+50]  | 7.12 (1.46-12.79)<br>[100] |
|            | <i>GCs</i>         | 8.9 (3.54-14.26)<br>[105]  | 1.78 (0-5.95)<br>[100]   | 2.84 (0-6.21)<br>[200]       | 1.4 ± 2<br>[50+50]    | 29.8 (17.8-41.8)<br>[100]  |

Variant allele frequency (VAF) in the bulk brain DNA and in pools of LCM-isolated cells obtained by ddPCR analysis are reported and the Poisson range (95% confidence interval) is given in parenthesis. When more than one pool was tested per cell type in a patient, the mean VAF ± standard deviation is reported. The number of cells pooled per cell type in each patient is detailed in square brackets (when multiple pools were tested a + is added to separate each pool). BCs: balloon cells, DNs: dysmorphic neurons, NNs: normal appearing neurons, GCs: glial cells.

## Supplementary Fig. 1

### mTOR activation in FCD2/HME brain specimens

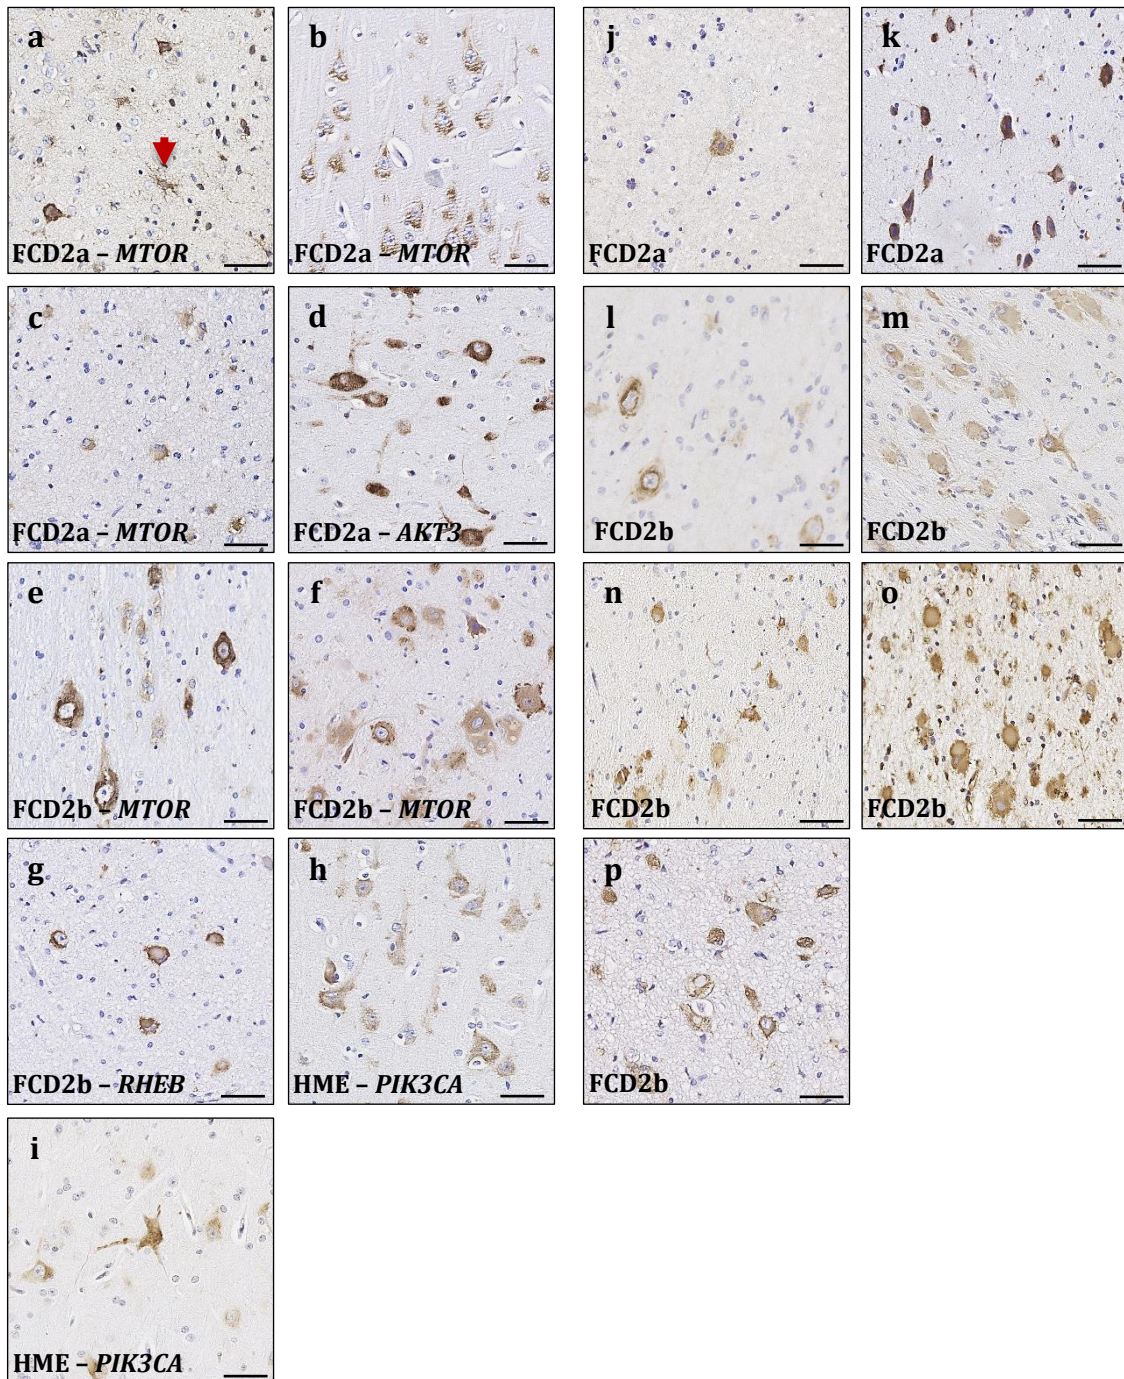

Immunohistochemistry of pS6 on Ser240/244 sites on FFPE 4 $\mu$ m brain sections. pS6 Ser240/244 signal is similar in panel-negative and panel-positive brain samples, suggesting a common pathogenic mechanism (mosaic mTOR hyperactivation). Panel-positive cases: (a) FCD-21; (b) FCD-26; (c) FCD-27; (d) FCD-31; (e) FCD-57; (f) FCD-59; (g) FCD-62; (h) HME-77; (i) HME-78. Panel-negative cases: (j) FCD-39; (k) FCD-46; (l) FCD-67; (m) FCD-69; (n) FCD-70; (o) FCD-71; (p) FCD-72. Scale bar: 50 $\mu$ m. In FCD-21 sample, a positive pS6 Ser240/244 signal is detectable in glial cells (red arrow in a).
